# Supplementary material for: Discovery of Molecular Markers to Discriminate Corneal Endothelial Cells in the Human Body
Source: PLoS One. 2015 Mar 25;10(3):e0117581. doi: 10.1371/journal.pone.0117581 (PMC4373821; doi:10.1371/journal.pone.0117581)
Supplement: S2 Table — (DOCX) [file pone.0117581.s003.docx]

Alistair R.R. Forrest1,98, Hideya Kawaji1,97,98, Michael Rehli2, J. Kenneth Baillie3, Michiel J.L. de Hoon1,98, Vanja Haberle4,5, Timo Lassmann1,98, Ivan V. Kulakovskiy6,7, Marina Lizio1,98, Masayoshi Itoh1,97,98, Robin Andersson8, Christopher J. Mungall9, Terrence F. Meehan10, Sebastian Schmeier11,96, Nicolas Bertin1,98, Mette Jørgensen8, Emmanuel Dimont12, Erik Arner1,98, Christian Schmidl2, Ulf Schaefer11, Yulia A. Medvedeva11, Charles Plessy1,98, Morana Vitezic1,14, Jessica Severin1,98, Colin A. Semple13, Yuri Ishizu1,98, Margherita Francescatto15,16, Intikhab Alam11, Davide Albanese17, Gabriel M. Altschuler12, John A.C. Archer11, Peter Arner18, Magda Babina19, Sarah Baker13, Piotr J. Balwierz20, Anthony G. Beckhouse21,22, Swati Pradhan-Bhatt23, Judith A. Blake24, Antje Blumenthal22,25, Beatrice Bodega26, Alessandro Bonetti1, James Briggs21, Frank Brombacher27,28, A. Maxwell Burroughs1, Andrea Califano29,30,31,32, Carlo V. Cannistraci33,34, Daniel Carbajo75, Yun Chen8, Marco Chierici17, Yari Ciani35, Hans C. Clevers36,37,38, Emiliano Dalla35, Carrie A. Davis39, Michael Detmar41, Alexander D. Diehl42, Taeko Dohi43, Finn Drabløs44, Albert S.B. Edge45, Matthias Edinger2,99, Karl Ekwall46, Mitsuhiro Endoh47, Hideki Enomoto48, Michela Fagiolini49, Lynsey Fairbairn3, Hai Fang50, Mary C. Farach-Carson51, Geoffrey J. Faulkner52, Alexander V. Favorov7,53,54, Malcolm E. Fisher3, Martin C. Frith55, Rie Fujita56, Shiro Fukuda1, Cesare Furlanello17, Masaaki Furuno1,98, Jun-ichi Furusawa47,57, Teunis B. Geijtenbeek58, Andrew Gibson59, Thomas Gingeras39, Daniel Goldowitz60, Julian Gough50, Sven Guhl19, Reto Guler27,28, Stefano Gustincich61, Thomas J. Ha60, Masahide Hamaguchi62, Mitsuko Hara63, Matthias Harbers1, Jayson Harshbarger1,98, Akira Hasegawa1,98, Yuki Hasegawa1,98, Takehiro Hashimoto1, Meenhard Herlyn64, Kelly J. Hitchens21,22, Shannan J. Ho Sui12, Oliver M. Hofmann12, Ilka Hoof8, Fumi Hori1,98, Lukasz Huminiecki14, Kei Iida65, Tomokatsu Ikawa47, Boris R. Jankovic11, Hui Jia66, Anagha Joshi3, Giuseppe Jurman17, Bogumil Kaczkowski1,98, Chieko Kai67, Kaoru Kaida1,98, Ai Kaiho1, Kazuhiro Kajiyama1,98, Mutsumi Kanamori-Katayama1, Artem S. Kasianov7, Takeya Kasukawa98, Shintaro Katayama1, Sachi Kato1,98, Shuji Kawaguchi65, Hiroshi Kawamoto47, Yuki I. Kawamura43, Tsugumi Kawashima1,98, Judith S. Kempfle45, Tony J. Kenna25, Juha Kere46,68, Levon M. Khachigian69, Toshio Kitamura70, S. Peter Klinken71, Alan J. Knox72, Miki Kojima1,98, Soichi Kojima63, Naoto Kondo1,98, Haruhiko Koseki47, Shigeo Koyasu47,57, Sarah Krampitz41, Atsutaka Kubosaki1, Andrew T. Kwon1,98, Jeroen F.J. Laros59, Weonju Lee73, Andreas Lennartsson46, Kang Li8, Berit Lilje8, Leonard Lipovich66, Alan Mackay-sim74, Ri-ichiroh Manabe1,98, Jessica C. Mar75, Benoit Marchand11, Anthony Mathelier60, Niklas Mejhert18, Alison Meynert13, Yosuke Mizuno76, David A. de Lima Morais77, Hiromasa Morikawa62, Mitsuru Morimoto48, Kazuyo Moro47,57,78, Efthymios Motakis1,98, Hozumi Motohashi79, Christine L. Mummery80, Mitsuyoshi Murata1,98, Sayaka Nagao-Sato1, Yutaka Nakachi76,81, Fumio Nakahara70, Toshiyuki Nakamura67, Yukio Nakamura82, Kenichi Nakazato1, Erik van Nimwegen20, Noriko Ninomiya1, Hiromi Nishiyori1,98, Shohei Noma1,98, Tadasuke Nozaki83, Soichi Ogishima84, Naganari Ohkura62, Hiroko Ohmiya1,98, Hiroshi Ohno47, Mitsuhiro Ohshima85, Mariko Okada-Hatakeyama47, Yasushi Okazaki76,81, Valerio Orlando26, Dmitry A. Ovchinnikov21, Arnab Pain11,33, Robert Passier80, Margaret Patrikakis69, Helena Persson46, Silvano Piazza35, James G.D. Prendergast13, Owen J.L. Rackham50, Jordan A. Ramilowski1,98, Mamoon Rashid11,33, Timothy Ravasi33,34, Patrizia Rizzu15, Marco Roncador17, Sugata Roy1,98, Morten B. Rye44, Eri Saijyo1, Antti Sajantila86, Akiko Saka1, Shimon Sakaguchi62, Mizuho Sakai1,98, Hiroki Sato67, Hironori Satoh56, Suzana Savvi27,28, Alka Saxena1, Claudio Schneider35, Erik A. Schultes59, Gundula G. Schulze-Tanzil87, Anita Schwegmann27,28, Thierry Sengstag1, Guojun Sheng48, Hisashi Shimoji1, Yishai Shimoni32, Jay W. Shin1,98, Christophe Simon1,98, Daisuke Sugiyama88, Takaaki Sugiyama67, Masanori Suzuki1, Rolf K. Swoboda64, Peter A.C. 't Hoen59,89, Michihira Tagami1,98, Naoko Takahashi1,98, Jun Takai56, Hiroshi Tanaka84, Hideki Tatsukawa90, Zuotian Tatum59, Mark Thompson59, Hiroo Toyoda83, Tetsuro Toyoda65, Eivind Valen91, Marc van de Wetering36, Linda M. van den Berg58, Roberto Verardo35, Dipti Vijayan21,22, Ilya E. Vorontsov7, Wyeth W. Wasserman60, Shoko Watanabe1, Christine A. Wells21,22, Louise N. Winteringham71, Ernst Wolvetang21, Emily J. Wood66, Yoko Yamaguchi92, Masayuki Yamamoto56, Misako Yoneda67, Yohei Yonekura48, Shigehiro Yoshida1,98, Suzan E. Zabierowski93, Peter G. Zhang60, Xiaobei Zhao8, Silvia Zucchelli61, Kim M. Summers3, Harukazu Suzuki1,98, Carsten O. Daub1, Jun Kawai1,97, Peter Heutink15, Winston Hide12, Tom C. Freeman3, Boris Lenhard5,94, Vladimir B. Bajic11, Martin S. Taylor13, Vsevolod J. Makeev7,95, Albin Sandelin8, David A. Hume3, Piero Carninci1,98, Yoshihide Hayashizaki1,97

1RIKEN Omics Science Center (OSC), 1-7-22 Suehiro-cho, Tsurumi-ku, Yokohama, 230-0045 Japan.

2Department of Internal Medicine III, University Hospital Regensburg, F.-J.-Strauss Allee 11, D-93042 Regensburg, Germany.

3The Roslin Institute and Royal (Dick) School of Veterinary Studies, University of Edinburgh, Easter Bush, Edinburgh, Midlothian, EH25 9RG Scotland, UK.

4Department of Biology, University of Bergen, Thormøhlensgate 53, NO-5006 Bergen, Norway.

5Faculty of Medicine, Institute of Clinical Sciences, MRC Clinical Sciences Centre, Imperial College London, Hammersmith Hospital Campus, London W12 0NN, UK.

6Laboratory of Bioinformatics and Systems Biology, Engelhardt Institute of Molecular Biology (EIMB), Vavilov str. 32, 119991 Moscow, Russia.

7Department of Computational Systems Biology, Vavilov Institute of General Genetics (VIGG), Gubkin str. 3, Moscow 119991, Russia.

8The Bioinformatics Centre, Department of Biology and BRIC, University of Copenhagen, Ole Maaloes Vej 5, DK 2200 Copenhagen, Denmark

9Genomics, Lawrence Berkeley National Laboratory, 84R01, 1 Cyclotron Road, Berkeley, CA 94720 USA.

10Mouse Informatics, EMBL-EBI, Wellcome Trust Genome Campus, Hinxton, Cambridgeshire, CB10 1SD, UK.

11Computational Bioscience Research Center, King Abdullah University of Science and Technology (KAUST), Ibn Al-Haytham Building -2, Thuwal 23955-6900, Kingdom of Saudi Arabia.

12Department of Biostatistics, Harvard School of Public Health, 655 Huntington Ave, Boston, MA 02115, USA.

13MRC Human Genetics Unit, MRC Institute of Genetics and Molecular Medicine (MRC-IGMM), University of Edinburgh, Western General Hospital, Crewe Road, Edinburgh, EH4 2XU, UK.

14Department of Cell and Molecular Biology, Karolinska Institutet, P.O. Box 285, SE-171 77 Stockholm, Sweden.

15Department of Clinical Genetics, VU University Medical Center Amsterdam, Van der Boechorststraat 7, 1081 BT Amsterdam, The Netherlands.

16Graduate Program in Areas of Basic and Applied Biology, Abel Salazar Biomedical Sciences Institute, University of Porto, Rua de Jorge Viterbo Ferreira n. 228, 4050-313 Porto, Portugal.

17Predictive Models for Biomedicine and Environment, Fondazione Bruno Kessler, via Sommarive 18, 38123 Trento TN, Italy.

18Department of Medicine, Karolinska Institutet at Karolinska University Hospital, Huddinge, SE-141 86 Huddinge, Sweden.

19Department of Dermatology and Allergy, Charité Campus Mitte, Universitätsmedizin Berlin, Chariteplatz 1, 10117 Berlin, Germany.

20Biozentrum, University of Basel, Klingelbergstrasse 50-70, 4056 Basel, Switzerland.

21Australian Institute for Bioengineering and Nanotechnology (AIBN), University of Queensland, Brisbane St Lucia, QLD 4072, Australia.

22Australian Infectious Diseases Research Centre (AID), University of Queensland, Brisbane St Lucia, QLD 4072, Australia.

23Department of Biological Sciences, University of Delaware, Newark, Delaware, USA.

24Bioinformatics and Computational Biology, The Jackson Laboratory, 600 Main Street, Bar Harbor, ME 04609 USA.

25Diamantina Institute, University of Queensland, Brisbane St Lucia, QLD 4072, Australia.

26Fondazione Santa Lucia, Dulbecco Telethon Institute, via del Fosso di Fiorano 64, 00143 Rome RM, Italy.

27Immunology and Infectious Disease, International Centre for Genetic Engineering & Biotechnology (ICGEB) Cape Town component, Anzio Road, Observatory 7925, Cape Town, South Africa.

28Division of Immunology, Institute of Infectious Diseases and Molecular Medicine (IIDMM), University of Cape Town, Anzio Road, Observatory 7925, Cape Town, South Africa.

29Department of Biochemistry and Mol. Biophysics, Columbia University Medical Center, 701 West 168th Street, New York, NY 10032 USA.

30Department of Biomedical Informatics, Columbia University Medical Center, 622 West 168th St. VC5, New York, NY 10032 USA.

31Institute of Cancer Genetics, Columbia University Medical Center, Herbert Irving Comprehensive Cancer Center, 1130 St. Nicholas Ave, New York, NY 10032 USA.

32Columbia Initiative in Systems Biology, Columbia University Medical Center, Herbert Irving Comprehensive Cancer Center, 1130 St. Nicholas Ave, New York, NY 10032 USA.

33Biological and Environmental Sciences and Engineering Division, King Abdullah University of Science and Technology (KAUST), Ibn Al-Haytham Building -2, Thuwal 23955-6900, Kingdom of Saudi Arabia.

34Applied Mathematics and Computational Science Program, King Abdullah University of Science and Technology (KAUST), Thuwal 23955-6900, Kingdom of Saudi Arabia.

35Laboratorio Nazionale del Consorzio Interuniversitario per le Biotecnologie (LNCIB), Padriciano 99, 34149 Trieste TS, Italy.

36Hubrecht Institute, Uppsalalaan 8, 3584 CT Utrecht, The Netherlands.

37The Royal Netherlands Academy of Arts and Sciences, P.O. Box 19121, NL-1000 GC Amsterdam, The Netherlands.

38University Medical Centre Utrecht, Postbus 85500 3508 GA Utrecht, The Netherlands.

39Genomics, Cold Spring Harbor Laboratory, 1 Bungtown Road, Cold Spring Harbor , NY 11797, USA.

40S..

41Institute of Pharmaceutical Sciences, ETH Zurich, Wolfgang-Pauli-Strasse 10, HCI H 303, 8093 Zurich, Switzerland.

42Department of Neurology, University at Buffalo School of Medicine and Biomedical Sciences, New York State Center of Excellence in Bioinformatics and Life Sciences, 701 Ellicott Street, Buffalo, NY 14203 USA.

43Gastroenterology, Research Center for Hepatitis and Immunology Research Institute, National Center for Global Health and Medicine, 1-7-1 Kohnodai, Ichikawa, Chiba, 272-8516 Japan.

44Department of Cancer Research and Molecular Medicine, Norwegian University of Science and Technology (NTNU), P.O. Box 8905, NO-7491 Trondheim, Norway.

45Department of Otology and Laryngology, Harvard Medical School, Massachusetts Eye and Ear Infirmary, Eaton-Peabody Lab, 243 Charles Street, Boston, MA 02114, USA.

46Department of Biosciences and Nutrition, Center for Biosciences, Karolinska Institutet, Hälsovägen 7-9, SE-141 83 Huddinge, Sweden.

47RIKEN Research Center for Allergy and Immunology (RCAI), 1-7-22 Suehiro, Tsurumi, Yokohama, Kanagawa, 230-0045, Japan.

48RIKEN Center for Developmental Biology (CDB), 2-2-3 Minatojima-minamimachi, Chuo-ku, Kobe, Hyogo, 650-0047 Japan.

49FM Kirby Neurobiology Center, Children’s Hospital Boston, Harvard . Medical School, 300 Longwood Ave, Boston MA 02115, USA.

50Department of Computer Science, University of Bristol, Merchant Venturers Building, Woodland Road, Clifton BS8 1UB, UK.

51Department of Biochemistry and Cell Biology, Rice University, Houston, Texas, USA.

52Cancer Biology Program, Mater Medical Research Institute, Raymond Tce, South Brisbane, QLD 4101, Australia.

53Department of Oncology, Division of Oncology, Biostatistics and Bioinformatics, Johns Hopkins University School of Medicine, 550 N Broadway, Baltimore, MD 21205, USA.

54Laboratory of Bioinformatics, Research Institute of Genetics and Selection of Industrial Microorganisms, 1-st Dorozhniy pr., 1, 117545 Moscow, Russia.

55Computational Biology Research Center, National Institute of Advanced Industrial Science and Technology (AIST), 2-4-7 Aomi, Koto-ku, Tokyo, 135-0064 Japan.

56Department of Medical Biochemistry, Tohoku University Graduate School of Medicine, 2-1 Seiryo-machi, Aoba-ku, Sendai, Miyagi, 980-8575 Japan.

57Department of Microbiology and Immunology, Keio University School of Medicine, 35 Shinanomachi, Shinjuku, Tokyo, 160-8582 Japan.

58Experimental Immunology, Academic Medical Center - University of Amsterdam, Meibergdreef 9 , 1105 AZ Amsterdam, The Netherlands.

59Department of Human Genetics, Leiden University Medical Center, Einthovenweg 20, 2333 ZC Leiden, The Netherlands.

60Department of Medical Genetics, Centre for Molecular Medicine and Therapeutics, Child and Family Research Institute , University of British Columbia , 950 West 28th Avenue, Vancouver, BC V5Z 4H4, Canada.

61Neuroscience, SISSA, via Bonomea 265, 34136 Trieste TS, Italy.

62Experimental Immunology, Immunology Frontier Research Center, Osaka University, 3-1 Yamadaoka, Suita, Osaka, 565-0871 Japan.

63RIKEN Advanced Science Institute (ASI), 2-1 Hirosawa, Wako, Saitama, 351-0198 Japan.

64Melanoma Research Center, The Wistar Institute, 3601 Spruce Street, Philadelphia, PA 19104, USA.

65RIKEN Bioinformatics And Systems Engineering Division (BASE), 1-7-22 Suehiro, Tsurumi, Yokohama, Kanagawa, 230-0045, Japan.

66Center for Molecular Medicine and Genetics, Wayne State University, 3228 Scott Hall, 540 East Canfield Street, Detroit, MI 48201-1928, USA.

67Laboratory Animal Research Center, Institute of Medical Science, The University of Tokyo, 4-6-1 Shirokanedai, Minato-ku, Tokyo, 108-8639 Japan.

68Science for Life Laboratory, Box 1031, SE-171 21 Solna, Sweden.

69Centre for Vascular Research, University of New South Wales, Sydney NSW 2052, Australia.

70Department of Hematopoietic Factor, Institute of Medical Science, University of Tokyo, Tokyo 108-8639, Japan.

71Western Australian Institute for Medical Research and Centre for Medical Research, The University of Western Australia, L6 MRF Building, Rear 50 Murray Street, Perth, WA 6000, Australia.

72Respiratory Medicine, University of Nottingham, Clinical Sciences Building, City Hospital, Hucknall Road, Nottingham, NG5 1PB, UK.

73Dermatology, School of Medicine, Kyungpook National University, 130 Dongdeok-ro Jung-gu, Daegu 700-721, South Korea.

74National Centre for Adult Stem Cell Research, Eskitis Institute for Cell and Molecular Therapies, Griffith University, Brisbane, Queensland, Australia.

75Systems and Computational Biology, Albert Einstein College of Medicine, 1300 Morris Park Ave Price 253, New York, NY 10461, USA.

76Division of Functional Genomics and Systems Medicine, Research Center for Genomic Medicine, Saitama Medical University, 1397-1 Yamane, Hidaka, Saitama, 350-1241 Japan.

77Faculty of Engneering, University of Bristol, Merchant Venturers Building, Woodland Road, Clifton BS8 1UB, UK.

78PRESTO, Japanese Science and Technology Agency (JST), 7 Gobancho, Chiyodaku, Tokyo, 102-0076 Japan.

79Center for Radioisotope Sciences, Tohoku University Graduate School of Medicine, 2-1 Seiryo-machi, Aoba-ku, Sendai, Miyagi, 980-8575 Japan.

80Anatomy and Embryology, Leiden University Medical Center, Einthovenweg 20, P.O. Box 9600, 2300 RC Leiden, The Netherlands.

81Division of Translational Research, Research Center for Genomic Medicine, Saitama Medical University, 1397-1 Yamane, Hidaka, Saitama, 350-1241 Japan.

82RIKEN BioResource Center (BRC), Koyadai 3-1-1, Tsukuba, Ibaraki, 305-0074 Japan.

83Department of Clinical Molecular Genetics, School of Pharmacy, Tokyo University of Pharmacy and Life Sciences, 1432-1 Horinouchi, Hachioji, Tokyo 192-0392, Japan.

84Department of Bioinformatics, Medical Research Institute, Tokyo Medical and Dental University, 1-5-45 Yushima, Bunkyo-ku, Tokyo, 113-8510 Japan.

85Department of Biochemistry, Ohu University School of Pharmaceutical Sciences, Misumido 31-1, Tomitamachi, Koriyama, Fukushima, 963-8611 Japan.

86Hjelt Institute, Department of Forensic Medicine, University of Helsinki, Kytosuontie 11, 003000 Helsinki, Finland.

87Department of Orthopedic, Trauma and Reconstructive Surgery, Charité Universitätsmedizin Berlin, Garystrasse 5, 14195 Berlin, Germany.

88Center for Clinical and Translational Reseach, Kyushu University Hospital, Station for Collaborative Research1 4F, 3-1-1 Maidashi, Higashi-Ku, Fukuoka, 812-8582 Japan.

89Netherlands Bioinformatics Centre, 260 NBIC, P.O. Box 9101, 6500 HB Nijmegen, The Netherlands.

90Graduate School of Pharmaceutical Sciences, Nagoya University, Furo-cho, Chikusa, Nagoya, Aichi, 464-8601 Japan.

91Department of Molecular and Cellular Biology, Harvard University, 16 Divinity Ave, Cambridge, MA 02138, USA.

92Department of Biochemistry, Nihon University School of Dentistry, 1-8-13, Kanda-Surugadai, Chiyoda-ku, Tokyo, 101-8310 Japan.

93Molecular and Cellular Oncogenesis, The Wistar Institute, 3601 Spruce Street, Philadelphia, PA 19104, USA.

94Department of Informatics, University of Bergen, Høgteknologisenteret, Thormøhlensgate 53, NO-5008 Bergen, Norway.

95Department of Biological and Medical Physics, Moscow Institute of Physics and Technology (MIPT) 9, Institutsky Per., Dolgoprudny, Moscow Region 141700, Russia.

96Current address: Massey University, New Zealand.

97RIKEN Preventive Medicine and Diagnosis Innovation Program

98RIKEN Center for Life Science Technologies (Division of Genomic Technologies)

99Regensburg Centre for Interventional Immunology (RCI), D-93042 Regensburg, Germany

Correspondence to: Alistair R. R. Forrest, Piero Carninci, and Yoshihide Hayashizaki
